# Supplementary material for: MnFe aminoclay as a novel catalyst: structural characterization and potential for catechol detection
Source: Royal Society of Chemistry journal article supplement (doi:10.1039/d5ra07889j), 2026-01-01
Supplement: d5ra07889j1.pdf [file d5ra07889j1.pdf]

## Supplementary Information

### MnFe Aminoclay as a Novel Catalyst: Structural Characterization and Potential for Catechol Detection

Hai Le Tran<sup>a,b,c,d,e</sup>, Kieu Tran Thi Thuy<sup>a</sup>, Luan Thanh Nguyen<sup>a,c,e</sup>, Viet Quoc Nguyen<sup>a,c,e</sup>, Tin  
Chanh Duc Doan<sup>b,c,d</sup>, Van-Quy Hoang<sup>f</sup>, Thi H. Ho<sup>g,h</sup>, Vu Khac Hoang Bui<sup>i,j\*</sup>

<sup>a</sup>*Ho Chi Minh City University of Technology (HCMUT), 268 Ly Thuong Kiet Street, Dien Hong Ward, Ho Chi Minh City, Vietnam*

<sup>b</sup>*University of Science (HCMUS), 227 Nguyen Van Cu Street, Cho Quan Ward, Ho Chi Minh City, Vietnam*

<sup>c</sup>*Viet Nam National University Ho Chi Minh City, Vo Truong Toan Street, VNU-HCM Urban Area, Quarter 33, Linh Xuan Ward, Ho Chi Minh City, Vietnam*

<sup>d</sup>*Advanced Materials Technology Institute (AMTI), Vo Truong Toan Street, VNU-HCM Urban Area, Quarter 33, Linh Xuan Ward, Ho Chi Minh City, Vietnam*

<sup>e</sup>*Key Laboratory for Polymer and Composite Materials, Viet Nam National University Ho Chi Minh City, 268 Ly Thuong Kiet Street, Dien Hong Ward, Ho Chi Minh City, Vietnam*

<sup>f</sup>*Center for Environmental Intelligence, College of Engineering and Computer Science, VinUniversity, Gia Lam district, Hanoi 14000, Vietnam. Email: quy.hv@vinuni.edu.vn*

<sup>g</sup>*Laboratory for Computational Physics, Institute for Computational Science and Artificial Intelligence, Van Lang University, Ho Chi Minh City, Viet Nam. Email: thi.hohuynh@vlu.edu.vn*

<sup>h</sup>*Faculty of Mechanical - Electrical and Computer Engineering, Van Lang School of Technology, Van Lang University, Ho Chi Minh City, Viet Nam*

<sup>i</sup>*Laboratory for Advanced Nanomaterials and Sustainable Energy Technologies, Institute for Computational Science and Artificial Intelligence, Van Lang University, Ho Chi Minh City, Vietnam. Email: vu.buikhachong@vlu.edu.vn*

<sup>j</sup>*Faculty of Applied Technology, Van Lang School of Technology, Van Lang University, Ho Chi Minh City, Vietnam*

\* Corresponding author

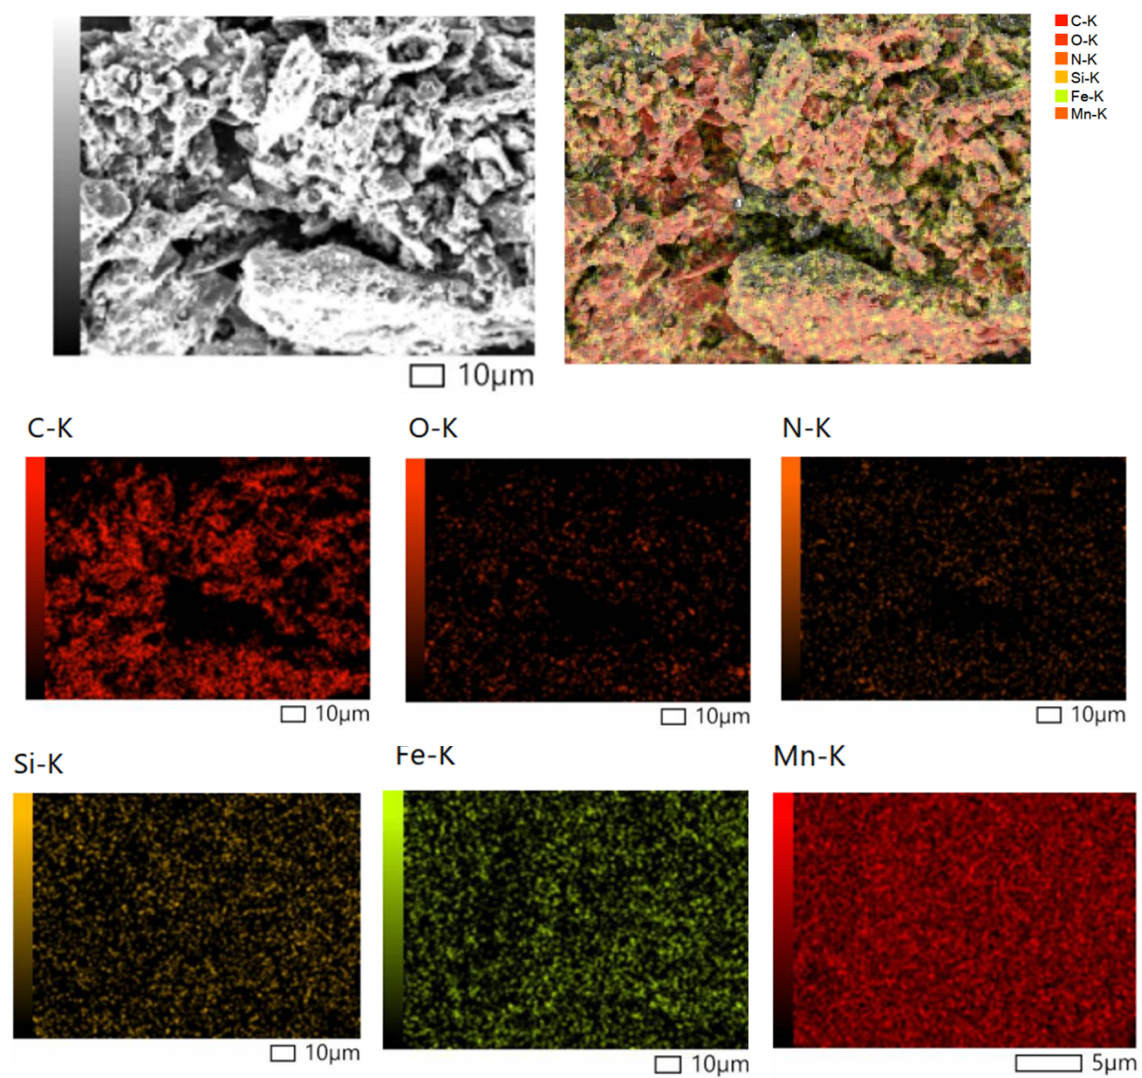

**Fig. S1** SEM-EDS elemental mapping images of MnFeAC (5:1)

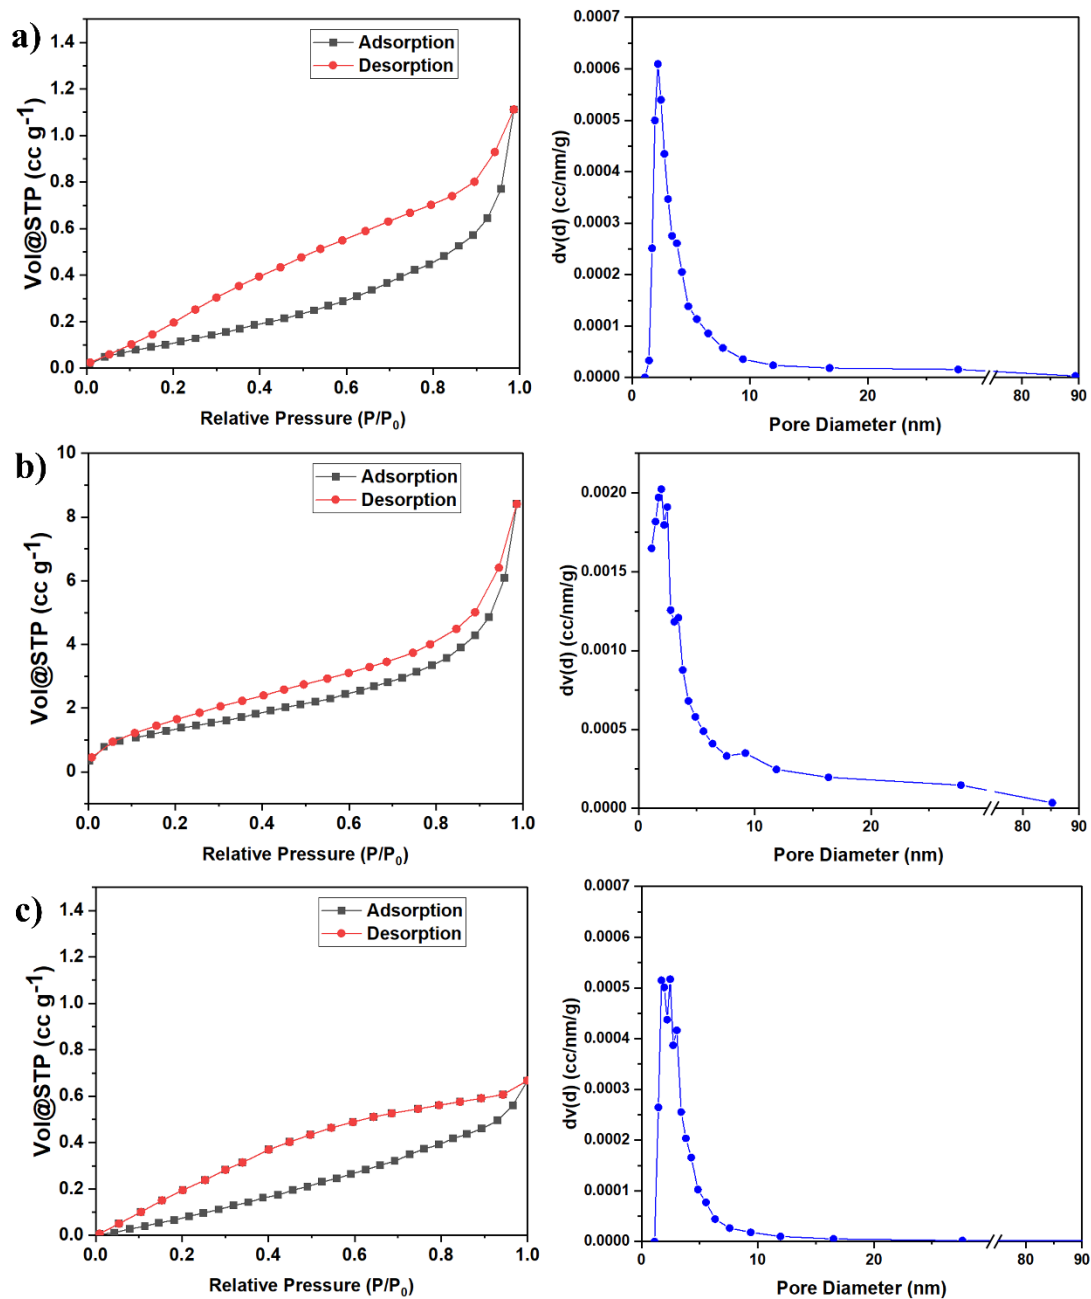

**Fig. S2** N<sub>2</sub> desorption isotherm (left) and BJH pore structure analysis of MnAC (a), FeAC (b), and MnFeAC (5:1) (c).

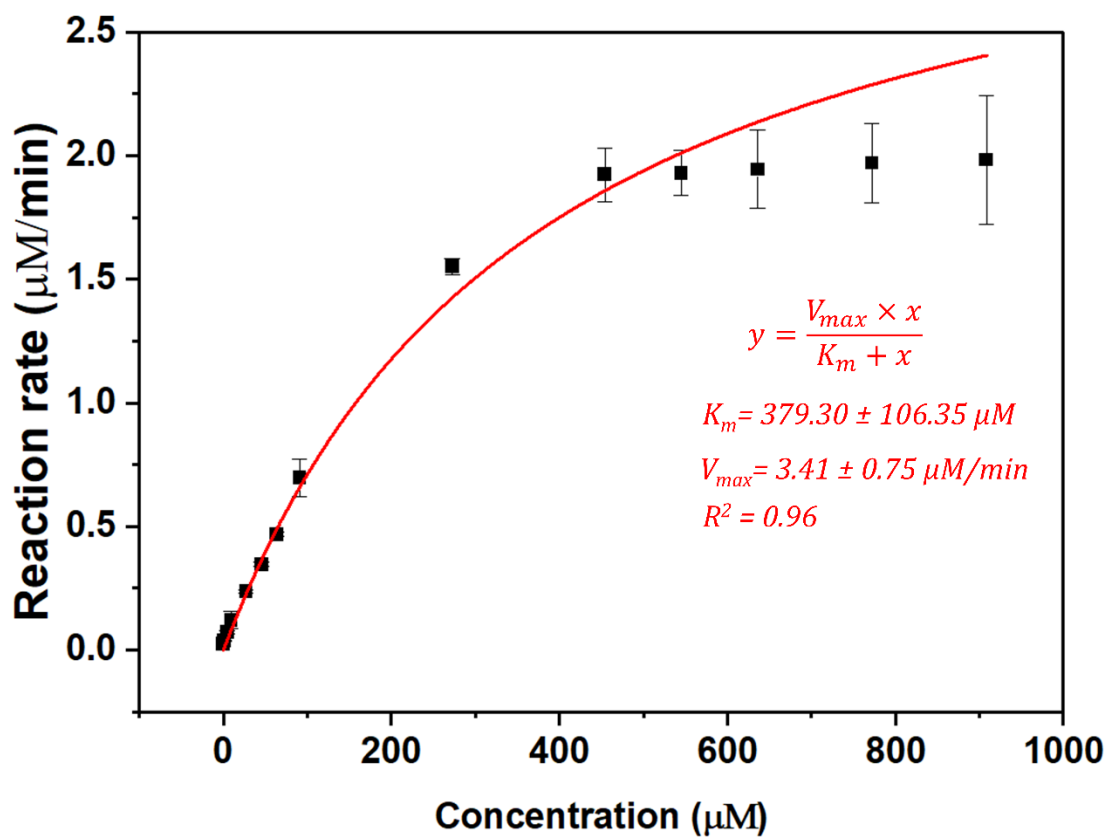

**Fig. S3** Michaelis-Menten kinetic analysis of catechol oxidation catalyzed by MnFeAC (5:1).

Experiments were performed in triplicate ( $n = 3$ ). Error bars indicate SD.

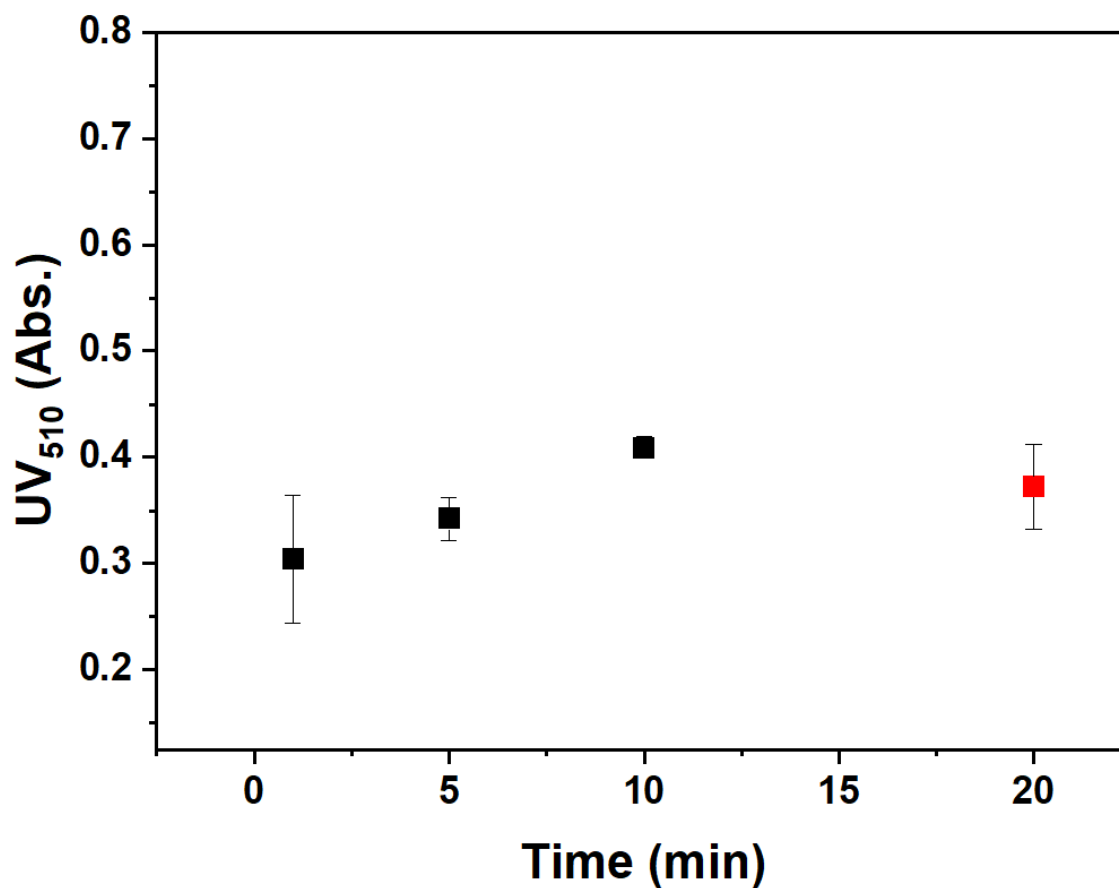

**Fig. S4** Effect of H<sub>2</sub>O<sub>2</sub> on the reaction time of the colorimetric detection system with MnFeAC (5:1) as catalyst. The red points represent reactions conducted without added H<sub>2</sub>O<sub>2</sub>. Reaction conditions: [Catechol] = 100  $\mu$ M; pH = 7.4; T° = 45°C; [4-AAP] = 0.1 mg mL<sup>-1</sup>. Experiments were performed in triplicate (n = 3). Error bars indicate SD.

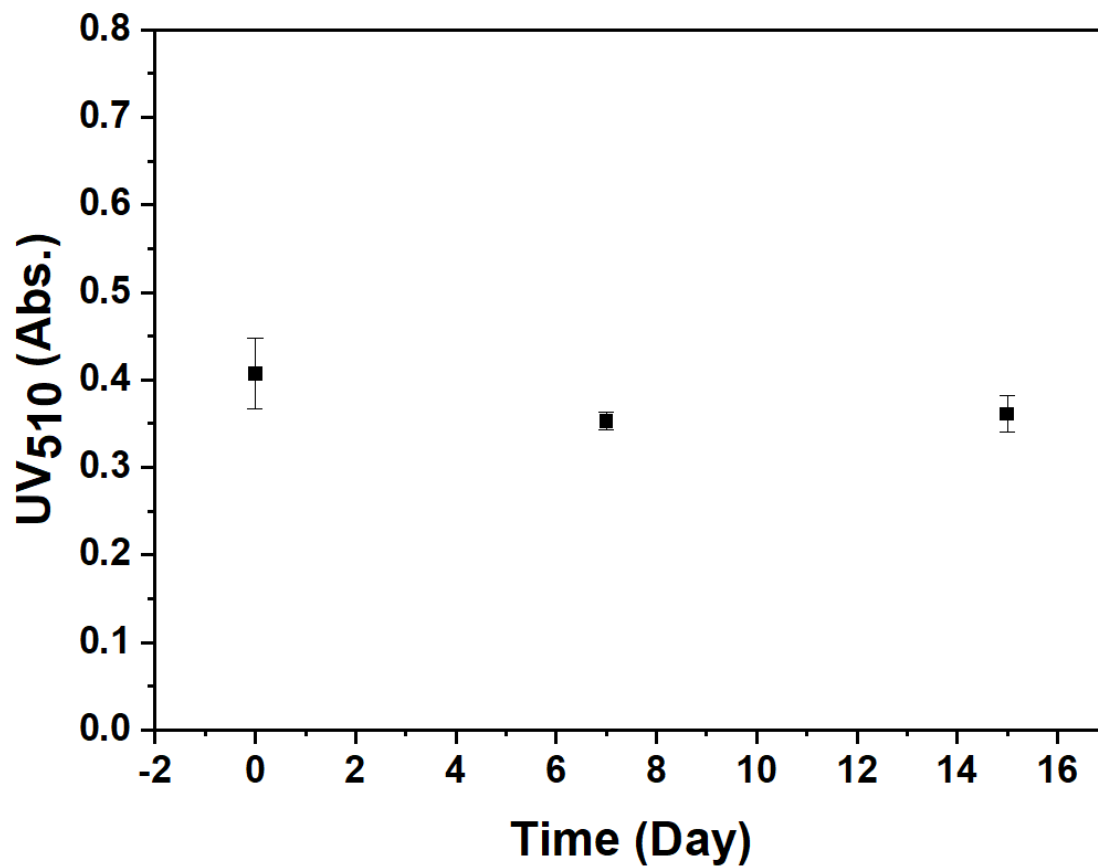

**Fig. S5** Storage ability of detection system with MnFeAC (5:1) as catalyst. Reaction conditions: [Catechol] = 100  $\mu\text{M}$ ; pH = 7.4;  $T^\circ = 45^\circ\text{C}$ ; [4-AAP] = 0.1  $\text{mg mL}^{-1}$ . Experiments were performed in triplicate ( $n = 3$ ). Error bars indicate SD.

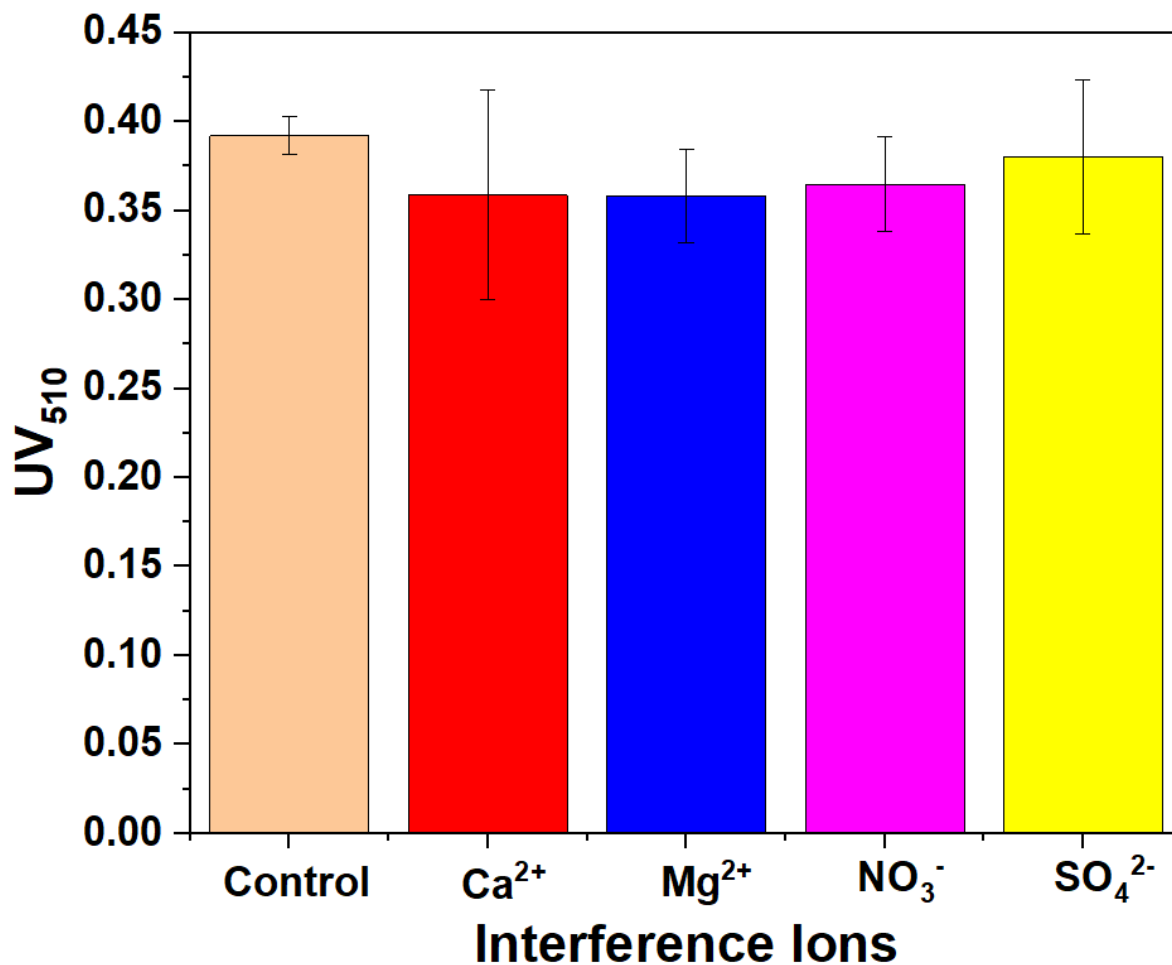

**Fig. S6** Effect of common inorganic ions on UV<sub>510</sub>. The concentration of each ions is 5 times higher than catechol (500  $\mu$ M). Reaction conditions: [Catechol] = 100  $\mu$ M; pH = 7.4; T° = 45°C; [4-AAP] = 0.1 mg mL<sup>-1</sup>. Experiments were performed in triplicate (n = 3). Error bars indicate SD.

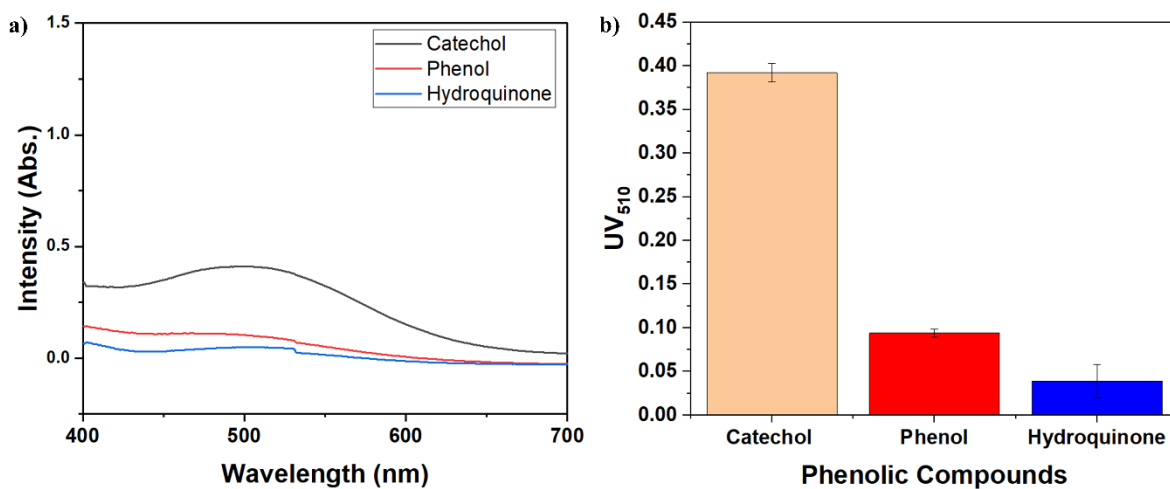

**Fig. S7** a) UV-vis absorption spectra of catechol, phenol, and hydroquinone recorded in the wavelength range of 400-700 nm. b) Corresponding colorimetric responses quantified as  $UV_{510}$  for the three phenolic compounds. Reaction conditions: [Phenolic compounds] = 100  $\mu$ M; pH = 7.4;  $T^\circ$  = 45°C; [4-AAP] = 0.1 mg mL<sup>-1</sup>. Experiments were performed in triplicate (n = 3). Error bars indicate SD.



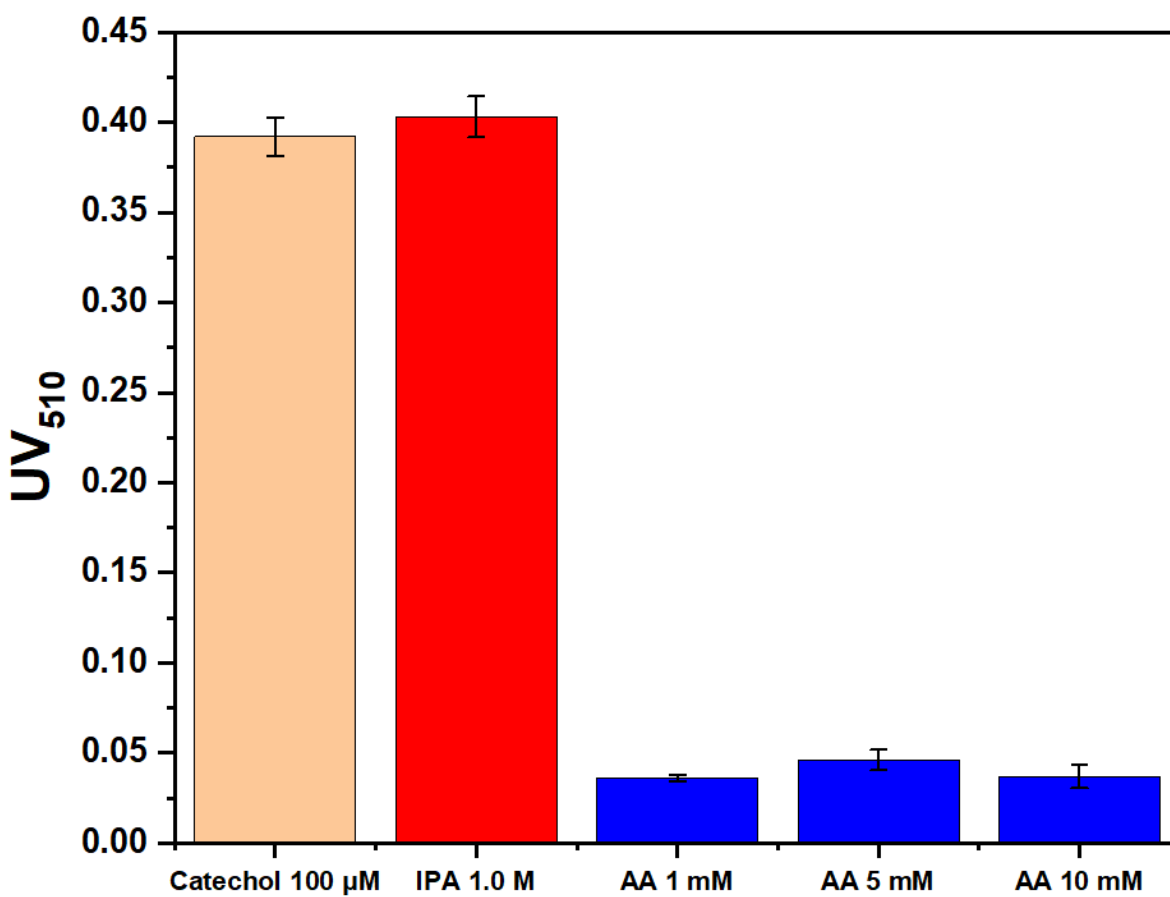

**Fig. S8** UV<sub>510</sub> response of detection system with 100 μM catechol in the presence of scavenging agents: isopropanol ( $\cdot\text{OH}$  scavenger) and ascorbic acid ( $\text{O}_2^{\cdot-}$  scavenger). Reaction conditions: pH = 7.4;  $T^\circ = 45^\circ\text{C}$ ; [4-AAP] = 0.1 mg mL<sup>-1</sup>. Experiments were performed in triplicate (n = 3). Error bars indicate SD.

**Table S1.** Specific surface area (BET), pore size, and pore volume of MnAC, FeAC, and MnFeAC (5:1)

| <b>Sample</b> | <b>BET Surface Area<br/>(m<sup>2</sup> g<sup>-1</sup>)</b> | <b>BJH Pore size<br/>(nm)</b> | <b>BJH Pore Volume<br/>(cm<sup>3</sup> g<sup>-1</sup>)</b> |
|---------------|------------------------------------------------------------|-------------------------------|------------------------------------------------------------|
| MnAC          | 0.60                                                       | 2.196                         | 0.002                                                      |
| FeAC          | 5.07                                                       | 1.966                         | 0.015                                                      |
| MnFeAC (5:1)  | 0.86                                                       | 2.466                         | 0.002                                                      |

| <b>C<sub>spiked</sub> (μM)</b>   | <b>C<sub>found</sub> (μM)</b> | <b>C<sub>unspiked</sub> (μM)</b> | <b>Recovery (%)</b> |
|----------------------------------|-------------------------------|----------------------------------|---------------------|
| 9.084                            | 13.38                         |                                  | 112.3%              |
| 45.42                            | 54.73                         | 3.18                             | 113.5%              |
| 90.84                            | 99.86                         |                                  | 106.6%              |
| <b><i>Mean (%)</i></b>           |                               |                                  | 110.8%              |
| <b><i>Standard Deviation</i></b> |                               |                                  | 3.79                |
| <b><i>RSD (%)</i></b>            |                               |                                  | 3.4%                |

**Table S2.** Recovery analysis of catechol detection in tap water using MnFeAC (5:1)
